# Supplementary material
Source: PubMed Central journal article supplement (PMC5469442)
Supplement: NIHMS856914-supplement-Supplement.pdf [file NIHMS856914-supplement-Supplement.pdf]

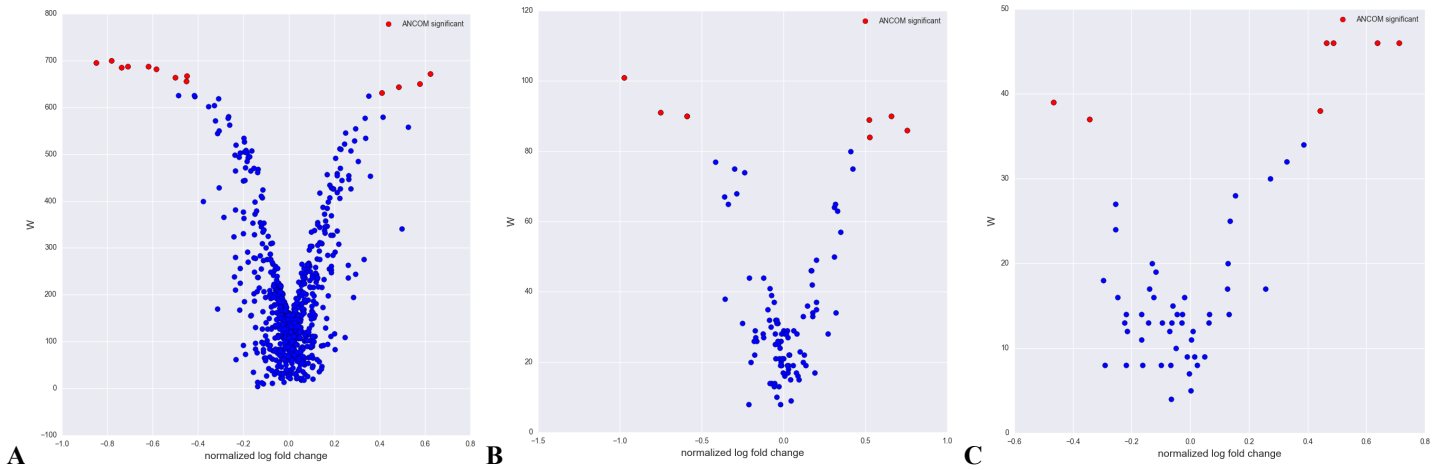

**Figure S1. Volcano plots of the results from ANCOM.**

Each point represents one of 709 OTUs (A), 103 genera (B), or 55 families (C) detected in this study, which were present in at least 10% of samples. The x-axis is the normalized log-fold change in relative abundance of each taxon in persons with PD versus controls. The y-axis is the  $W$ -statistics from ANCOM. Briefly, for each of the  $n$  taxa, the mean abundance in cases vs. controls is compared to the data on the other  $n-1$  taxa using a t-test and Benjamini–Hochberg procedure to control for the FDR at 0.05, and the number of null of hypotheses rejected is denoted as  $W$  (which can range from 0 to  $n-1$  in this study). The threshold for significance,  $w_0$ , is calculated empirically;  $W$ 's that were greater than  $w_0$  are denoted as significant (red points). ANCOM does not assign a P-value for this last step, but P-values and FDR control are used to arrive at  $W$ . 13 OTUs (A), 8 genera (B), and 7 families (C) achieved significance, shown in red here, and named in **Table S2** and **Table 2**.

**Table S1. Sample sizes and distribution of variables that might be potential confounders.**

|                                         |                                                         | PD          | Control                     | Total       |                           |                |
|-----------------------------------------|---------------------------------------------------------|-------------|-----------------------------|-------------|---------------------------|----------------|
|                                         | Number of subjects recruited                            | 212         | 136                         | 348         |                           |                |
|                                         | Sample size analyzed <sup>b</sup>                       | 197         | 130                         | 327         |                           |                |
| 1 <sup>a</sup>                          | Albany, NY                                              | 74          | 61                          | 135         |                           |                |
|                                         | Atlanta, GA                                             | 31          | 12                          | 43          |                           |                |
|                                         | Seattle, WA                                             | 92          | 57                          | 149         |                           |                |
| 2 <sup>a</sup>                          | Spouses                                                 | 54          | 54                          | 108         |                           |                |
|                                         | Non-spouses                                             | 143         | 76                          | 219         |                           |                |
| COMPARING COVARIATES IN PD VS. CONTROLS |                                                         | N with data | Result                      | N with data | Result                    | P <sup>c</sup> |
| 3 <sup>a</sup>                          | Sex: Female; Male (% Male)                              | 197         | 65; 132 (67.0%)             | 130         | 79; 51 (39.2%)            | 9E-7           |
| 4 <sup>a</sup>                          | Age: Min, Max, Median, Mean, SD                         | 197         | 44, 94, 69, 68.4, 9.2       | 130         | 36, 88, 70.5, 70.3, 8.6   | 0.04           |
| 5 <sup>a</sup>                          | Days in Transit: Min, Max, Median, Mean, SD             | 188         | 1, 10, 3, 3.2, 1.9          | 126         | 1, 8, 2, 2.6, 1.5         | 1E-3           |
| 6 <sup>a</sup>                          | Body Mass Index: Min, Max, Median, Mean, SD             | 190         | 14.6, 45.6, 25.8, 26.4, 5.3 | 126         | 17.5, 45, 26.5, 28.3, 5.7 | 9E-3           |
| 7                                       | Gained ≥10 pounds in Past Year: N (%)                   | 194         | 25 (12.9%)                  | 127         | 10 (7.9%)                 | 0.20           |
| 8 <sup>a</sup>                          | Lost ≥10 pounds in Past Year: N (%)                     | 193         | 44 (22.8%)                  | 124         | 15 (12.1%)                | 0.02           |
| 9 <sup>a</sup>                          | Born by cesarean section: N (%)                         | 185         | 11 (5.9%)                   | 117         | 0 (0%)                    | 8E-3           |
| 10                                      | Crohn's Disease: N (%)                                  | 191         | 3 (1.6%)                    | 129         | 1 (0.8%)                  | 0.65           |
| 11                                      | Inflammatory Bowel Disease: N (%)                       | 191         | 5 (2.6%)                    | 128         | 2 (1.6%)                  | 0.71           |
| 12                                      | Irritable Bowel Syndrome: N (%)                         | 189         | 14 (7.4%)                   | 128         | 8 (6.2%)                  | 0.82           |
| 13                                      | Colitis: N (%)                                          | 190         | 9 (4.7%)                    | 128         | 2 (1.6%)                  | 0.21           |
| 14                                      | Ulcers: N (%)                                           | 190         | 17 (8.9%)                   | 128         | 9 (7.0%)                  | 0.68           |
| 15                                      | Any of the above GI problems (Variables 10-14): N (%)   | 191         | 37 (19.4%)                  | 129         | 19 (14.7%)                | 0.30           |
| 16 <sup>a</sup>                         | Gastrointestinal discomfort on day of collection: N (%) | 181         | 104 (57.5%)                 | 118         | 26 (22.0%)                | 2E-9           |
| 17 <sup>a</sup>                         | Constipation in past 3 months: N (%)                    | 189         | 82 (43.4%)                  | 128         | 6 (4.7%)                  | 6E-16          |
| 18                                      | Diarrhea in past 3 months: N (%)                        | 187         | 30 (16.0%)                  | 125         | 28 (22.4%)                | 0.18           |
| 19                                      | Eats yogurt at least a few times a week: N (%)          | 189         | 67 (35.4%)                  | 126         | 55 (43.7%)                | 0.16           |
| 20                                      | Eats grains at least once a day: N (%)                  | 190         | 132 (69.5%)                 | 127         | 85 (66.9%)                | 0.71           |
| 21                                      | Eats meat at least once a day: N (%)                    | 191         | 109 (57.1%)                 | 129         | 81 (62.8%)                | 0.35           |
| 22 <sup>a</sup>                         | Eats fruit or vegetables at least once a day: N (%)     | 192         | 150 (78.1%)                 | 129         | 114 (88.4%)               | 0.02           |
| 23                                      | Eats nuts at least once a day: N (%)                    | 192         | 42 (21.9%)                  | 128         | 36 (28.1%)                | 0.23           |
| 24                                      | Currently smokes: N (%)                                 | 194         | 14 (7.2%)                   | 129         | 5 (3.9%)                  | 0.24           |
| 25                                      | Currently drinks caffeinated coffee: N (%)              | 191         | 136 (71.2%)                 | 129         | 98 (76.0%)                | 0.37           |
| 26 <sup>a</sup>                         | Currently drinks alcohol: N (%)                         | 192         | 114 (59.4%)                 | 129         | 92 (71.3%)                | 0.03           |
| 27 <sup>a</sup>                         | Currently taking digestive medication: N (%)            | 190         | 58 (31.1%)                  | 124         | 21 (16.9%)                | 5E-3           |
| 28                                      | Currently taking anti-inflammatory drugs: N (%)         | 188         | 76 (40.4%)                  | 126         | 55 (43.7%)                | 0.64           |
| 29                                      | Currently taking probiotics: N (%)                      | 182         | 42 (23.1%)                  | 126         | 32 (25.4%)                | 0.68           |
| 30                                      | Currently taking antibiotics: N (%)                     | 191         | 8 (4.2%)                    | 128         | 3 (2.3%)                  | 0.54           |
| 31                                      | Completed antibiotics in past 3 months: N (%)           | 188         | 24 (12.8%)                  | 128         | 21 (16.4%)                | 0.41           |
| PD MEDICATION USED AT THE TIME OF STUDY |                                                         |             |                             |             |                           |                |
| 32 <sup>a</sup>                         | Carbidopa/levodopa: N (%)                               | 185         | 168 (90.8%)                 | -           | -                         | -              |
| 33 <sup>a</sup>                         | Dopamine agonist: N (%)                                 | 185         | 99 (53.5%)                  | -           | -                         | -              |
| 34 <sup>a</sup>                         | COMT inhibitor: N (%)                                   | 185         | 37 (20.0%)                  | -           | -                         | -              |
| 35 <sup>a</sup>                         | MAO-B inhibitor: N (%)                                  | 185         | 71 (38.4%)                  | -           | -                         | -              |
| 36 <sup>a</sup>                         | Anticholinergic: N (%)                                  | 185         | 7 (3.8%)                    | -           | -                         | -              |
| 37 <sup>a</sup>                         | Amantadine: N (%)                                       | 185         | 49 (26.5%)                  | -           | -                         | -              |
| 38                                      | Un-medicated: N (%)                                     | 185         | 3 (1.6%)                    | -           | -                         | -              |
| 39 <sup>a</sup>                         | Disease duration: Min, Max, Median, Mean, SD            | 197         | 1, 35, 14, 13.7, 6.5        |             |                           |                |

<sup>a</sup> 20 Variables considered as potential confounders.

<sup>b</sup> Excluded 2 samples with poor metadata, 6 with no called OTUs, 13 with <5000 sequences.

<sup>c</sup> To identify potential confounders, the difference between cases and controls was tested using the Mann-Whitney U test for quantitative variables (Days in transit, Age, BMI) and Fisher's Exact test for dichotomous variables. To be conservative, P values are uncorrected. Variables that differed between cases and controls at uncorrected P<0.1 were declared potential confounder.

Variable 1: Geographic site of data collection

Variable 2: Patients' spouses were asked to volunteer as controls.

Variable 3: Sex differential is due to the higher incidence of PD in men and the majority of spouse controls being women.

Variable 5: Date the laboratory received the sample minus the date stool was collected.

Variable 6: Subjects reported weight and height. BMI = Weight in pounds \* 703 / Height in inches<sup>2</sup>.

Variables 6-8: Weight change and BMI can vary by sex, and PD has a sex bias. To investigate effect of sex, we used logistic or linear regression in addition to Mann-Whitney U or Fisher's exact tests (which do not allow covariate adjustment) and included sex in the model. Results are similar whether sex is the model or not: there are significant differences between cases and controls in BMI and in loss of  $\geq 10$  pounds in past year. Variables 24 and 25: smoking and caffeine use prior to development of PD are inversely associated with the risk of developing the disease, (true in this sample as well). Here, with the effect on microbiome in mind, we asked at the time of study if they currently smoked or drank caffeinated coffee.

Sources of data: Data on variables 1-2 were collected by study staff. Data on variables 3-31 were reported by the subjects on the Gut Microbiome Questionnaire at the time of study. Data on variables 32-38 were retrieved from medical records by the neurologists and correspond to the medications that patient was prescribed for treatment of PD at the time of this study (stool collection). Data on variable 39 were collected by investigators using study records, measured as age at stool collection minus age at onset of PD.

**Table S2. Taxa with significant evidence for association with PD.** The list includes taxa that reached significance using ANCOM or Kruskal-Wallis. A) OTUs significant from ANCOM (13 OTUs) or Kruskal-Wallis (100 OTUs). B) Genera significant from ANCOM (8 genera) or Kruskal-Wallis (48 genera). C) Families significant from ANCOM (7 families) or Kruskal-Wallis (19 families). All taxa from ANCOM are represented in and are among the most significant in KW at each taxonomic level.

| A) OTU<br>Kingdom;Phylum;Class;Order;Family;Genus;Species                                                           | Taxon ID | Mean Abundance |          | Abundance ratio<br>Case/Control | ANCOM<br>W | KW<br>FDR_P |
|---------------------------------------------------------------------------------------------------------------------|----------|----------------|----------|---------------------------------|------------|-------------|
|                                                                                                                     |          | Cases          | Controls |                                 |            |             |
| <i>Bacteria;Firmicutes;Clostridia;Clostridiales;Lachnospiraceae;Blautia;unclassified</i>                            | 4465907  | 0.0051         | 0.0084   | 0.61                            | 700        | 6E-06       |
| <i>Bacteria;Firmicutes;Clostridia;Clostridiales;Lachnospiraceae;unclassified;unclassified</i>                       | 4457438  | 0.0149         | 0.0275   | 0.54                            | 695        | 2E-03       |
| <i>Bacteria;Firmicutes;Clostridia;Clostridiales;Ruminococcaceae;Faecalibacterium;prausnitzii</i>                    | 4381430  | 0.0059         | 0.0125   | 0.47                            | 688        | 4E-03       |
| <i>Bacteria;Firmicutes;Clostridia;Clostridiales;Lachnospiraceae;Roseburia;unclassified</i>                          | 4481427  | 0.0020         | 0.0044   | 0.45                            | 688        | 2E-04       |
| <i>Bacteria;Firmicutes;Clostridia;Clostridiales;Ruminococcaceae;Faecalibacterium;prausnitzii</i>                    | 4481131  | 0.0155         | 0.0241   | 0.64                            | 685        | 4E-03       |
| <i>Bacteria;Firmicutes;Clostridia;Clostridiales;Lachnospiraceae;Roseburia;faecis</i>                                | 4392188  | 0.0031         | 0.0060   | 0.53                            | 682        | 8E-04       |
| <i>Bacteria;Actinobacteria;Actinobacteria;Bifidobacteriales;Bifidobacteriaceae;Bifidobacterium;adolescentis</i>     | 4347159  | 0.0119         | 0.0071   | 1.66                            | 672        | 3E-03       |
| <i>Bacteria;Firmicutes;Clostridia;Clostridiales;Lachnospiraceae;unclassified;unclassified</i>                       | 180999   | 0.0005         | 0.0013   | 0.39                            | 667        | 2E-04       |
| <i>Bacteria;Firmicutes;Clostridia;Clostridiales;Lachnospiraceae;unclassified;unclassified</i>                       | 4325096  | 0.0008         | 0.0023   | 0.37                            | 664        | 2E-03       |
| <i>Bacteria;Firmicutes;Clostridia;Clostridiales;Lachnospiraceae;Coproccoccus;unclassified</i>                       | 173969   | 0.0011         | 0.0024   | 0.44                            | 656        | 8E-04       |
| <i>Bacteria;Bacteroidetes;Bacteroidia;Bacteroidales;Porphyromonadaceae;Parabacteroides;distasonis</i>               | 4365130  | 0.0203         | 0.0145   | 1.40                            | 650        | 4E-02       |
| <i>Bacteria;Firmicutes;Clostridia;Clostridiales;Ruminococcaceae;unclassified;unclassified</i>                       | 4439469  | 0.0047         | 0.0023   | 1.99                            | 644        | 4E-03       |
| <i>Bacteria;Bacteroidetes;Bacteroidia;Bacteroidales;Prevotellaceae;Prevotella;unclassified</i>                      | 1077373  | 0.0029         | 0.0004   | 7.29                            | 631        | 5E-03       |
| <i>Bacteria;Firmicutes;Clostridia;Clostridiales;Lachnospiraceae;unclassified;unclassified</i>                       | 4416570  | 0.0021         | 0.0037   | 0.57                            | not sig    | 1E-02       |
| <i>Bacteria;Firmicutes;Clostridia;Clostridiales;Lachnospiraceae;unclassified;unclassified</i>                       | 4443172  | 0.0032         | 0.0055   | 0.57                            | not sig    | 1E-02       |
| <i>Bacteria;Bacteroidetes;Bacteroidia;Bacteroidales;Porphyromonadaceae;Porphyromonas;unclassified</i>               | 495451   | 0.0012         | 0.0002   | 7.43                            | not sig    | 7E-04       |
| <i>Bacteria;Firmicutes;Clostridia;Clostridiales;Lachnospiraceae;Coproccoccus;unclassified</i>                       | 4478815  | 0.0024         | 0.0034   | 0.68                            | not sig    | 6E-03       |
| <i>Bacteria;Firmicutes;Clostridia;Clostridiales;Ruminococcaceae;unclassified;unclassified</i>                       | 174818   | 0.0005         | 0.0009   | 0.53                            | not sig    | 8E-04       |
| <i>Bacteria;Firmicutes;Clostridia;Clostridiales;Clostridiaceae;Clostridium;unclassified</i>                         | 3931537  | 0.0007         | 0.0012   | 0.60                            | not sig    | 4E-03       |
| <i>Bacteria;Firmicutes;Clostridia;Clostridiales;Lachnospiraceae;unclassified;unclassified</i>                       | 176306   | 0.0010         | 0.0018   | 0.58                            | not sig    | 7E-03       |
| <i>Bacteria;Firmicutes;Clostridia;Clostridiales;Ruminococcaceae;unclassified;unclassified</i>                       | 174840   | 0.0004         | 0.0007   | 0.51                            | not sig    | 3E-03       |
| <i>Bacteria;Firmicutes;Clostridia;Clostridiales;[Tissierellaceae];WAL_1855D;unclassified</i>                        | 505670   | 0.0057         | 0.0017   | 3.43                            | not sig    | 5E-02       |
| <i>Bacteria;Firmicutes;Clostridia;Clostridiales;Lachnospiraceae;unclassified;unclassified</i>                       | 4473509  | 0.0004         | 0.0009   | 0.38                            | not sig    | 9E-04       |
| <i>Bacteria;Firmicutes;Erysipelotrichi;Erysipelotrichales;Erysipelotrichaceae;Coproccoccus;unclassified</i>         | 587933   | 0.0017         | 0.0001   | 12.55                           | not sig    | 6E-03       |
| <i>Bacteria;Firmicutes;Clostridia;Clostridiales;Ruminococcaceae;unclassified;unclassified</i>                       | 4414476  | 0.0016         | 0.0016   | 1.01                            | not sig    | 7E-03       |
| <i>Bacteria;Firmicutes;Clostridia;Clostridiales;Ruminococcaceae;Oscillospira;unclassified</i>                       | 180468   | 0.0004         | 0.0008   | 0.57                            | not sig    | 4E-03       |
| <i>Bacteria;Firmicutes;Clostridia;Clostridiales;Ruminococcaceae;unclassified;unclassified</i>                       | 183650   | 0.0008         | 0.0001   | 7.05                            | not sig    | 2E-02       |
| <i>Bacteria;Firmicutes;Clostridia;Clostridiales;unclassified;unclassified;unclassified</i>                          | 4469007  | 0.0007         | 0.0018   | 0.39                            | not sig    | 3E-02       |
| <i>Bacteria;Actinobacteria;Actinobacteria;Bifidobacteriales;Bifidobacteriaceae;Bifidobacterium;unclassified</i>     | 4335781  | 0.0004         | 0.0000   | 10.89                           | not sig    | 3E-03       |
| <i>Bacteria;Firmicutes;Clostridia;Clostridiales;Lachnospiraceae;Blautia;unclassified</i>                            | 4352657  | 0.0016         | 0.0025   | 0.61                            | not sig    | 2E-02       |
| <i>Bacteria;Firmicutes;Clostridia;Clostridiales;Lachnospiraceae;unclassified;unclassified</i>                       | 4396297  | 0.0001         | 0.0003   | 0.32                            | not sig    | 4E-03       |
| <i>Bacteria;Firmicutes;Clostridia;Clostridiales;Ruminococcaceae;Ruminococcus;unclassified</i>                       | 4427459  | 0.0015         | 0.0005   | 3.05                            | not sig    | 4E-02       |
| <i>Bacteria;Actinobacteria;Actinobacteria;Actinomycetales;Corynebacteriaceae;Corynebacterium;unclassified</i>       | 4364814  | 0.0018         | 0.0009   | 1.91                            | not sig    | 5E-03       |
| <i>Bacteria;Firmicutes;Clostridia;Clostridiales;Lachnospiraceae;Blautia;unclassified</i>                            | 4359797  | 0.0002         | 0.0004   | 0.48                            | not sig    | 4E-03       |
| <i>Archaea;Euryarchaeota;Methanobacteria;Methanobacteriales;Methanobacteriaceae;Methanobrevibacter;unclassified</i> | 849440   | 0.0006         | 0.0004   | 1.41                            | not sig    | 2E-02       |
| <i>Bacteria;Firmicutes;Clostridia;Clostridiales;unclassified;unclassified;unclassified</i>                          | 4371061  | 0.0006         | 0.0008   | 0.69                            | not sig    | 1E-02       |
| <i>Bacteria;Firmicutes;Bacilli;Lactobacillales;Lactobacillaceae;Lactobacillus;unclassified</i>                      | 4428313  | 0.0004         | 0.0000   | 16.08                           | not sig    | 4E-03       |
| <i>Bacteria;Firmicutes;Clostridia;Clostridiales;Ruminococcaceae;Oscillospira;unclassified</i>                       | 4366089  | 0.0005         | 0.0000   | 12.52                           | not sig    | 4E-03       |
| <i>Bacteria;Firmicutes;Clostridia;Clostridiales;Lachnospiraceae;unclassified;unclassified</i>                       | 4217963  | 0.0003         | 0.0005   | 0.54                            | not sig    | 5E-03       |
| <i>Bacteria;Firmicutes;Clostridia;Clostridiales;Ruminococcaceae;unclassified;unclassified</i>                       | 195651   | 0.0001         | 0.0003   | 0.44                            | not sig    | 3E-03       |
| <i>Bacteria;Firmicutes;Clostridia;Clostridiales;Ruminococcaceae;Ruminococcus;unclassified</i>                       | 2979308  | 0.0011         | 0.0005   | 2.12                            | not sig    | 3E-02       |
| <i>Bacteria;Firmicutes;Clostridia;Clostridiales;Lachnospiraceae;unclassified;unclassified</i>                       | 4331360  | 0.0002         | 0.0005   | 0.50                            | not sig    | 1E-02       |

|                                                                                                                  |         |        |        |       |                |       |
|------------------------------------------------------------------------------------------------------------------|---------|--------|--------|-------|----------------|-------|
| <i>Bacteria;Firmicutes;Clostridia;Clostridiales;Ruminococcaceae;unclassified;unclassified</i>                    | 179826  | 0.0006 | 0.0008 | 0.79  | <i>not sig</i> | 6E-03 |
| <i>Bacteria;Firmicutes;Clostridia;Clostridiales;Lachnospiraceae;unclassified;unclassified</i>                    | 4473788 | 0.0001 | 0.0005 | 0.30  | <i>not sig</i> | 4E-03 |
| <i>Bacteria;Firmicutes;Clostridia;Clostridiales;Lachnospiraceae;unclassified;unclassified</i>                    | 4472399 | 0.0008 | 0.0012 | 0.68  | <i>not sig</i> | 2E-02 |
| <i>Bacteria;Firmicutes;Clostridia;Clostridiales;unclassified;unclassified;unclassified</i>                       | 338301  | 0.0001 | 0.0003 | 0.26  | <i>not sig</i> | 6E-03 |
| <i>Bacteria;Proteobacteria;Gammaproteobacteria;Pasteurellales;Pasteurellaceae;Haemophilus;parainfluenzae</i>     | 4477696 | 0.0003 | 0.0012 | 0.22  | <i>not sig</i> | 3E-02 |
| <i>Bacteria;Firmicutes;Clostridia;Clostridiales;unclassified;unclassified;unclassified</i>                       | 4385326 | 0.0002 | 0.0004 | 0.47  | <i>not sig</i> | 8E-03 |
| <i>Bacteria;Firmicutes;Clostridia;Clostridiales;Ruminococcaceae;unclassified;unclassified</i>                    | 182044  | 0.0004 | 0.0001 | 3.76  | <i>not sig</i> | 2E-02 |
| <i>Bacteria;Firmicutes;Clostridia;Clostridiales;Ruminococcaceae;unclassified;unclassified</i>                    | 730906  | 0.0003 | 0.0005 | 0.68  | <i>not sig</i> | 4E-03 |
| <i>Bacteria;Firmicutes;Clostridia;Clostridiales;Lachnospiraceae;unclassified;unclassified</i>                    | 4448492 | 0.0002 | 0.0005 | 0.45  | <i>not sig</i> | 3E-02 |
| <i>Bacteria;Firmicutes;Clostridia;Clostridiales;Lachnospiraceae;Roseburia;unclassified</i>                       | 2438203 | 0.0001 | 0.0003 | 0.46  | <i>not sig</i> | 6E-03 |
| <i>Bacteria;Proteobacteria;Deltaproteobacteria;Desulfovibrionales;Desulfovibrionaceae;Bilophila;unclassified</i> | 354574  | 0.0006 | 0.0001 | 10.01 | <i>not sig</i> | 5E-02 |
| <i>Bacteria;Firmicutes;Clostridia;Clostridiales;Ruminococcaceae;unclassified;unclassified</i>                    | 195556  | 0.0001 | 0.0002 | 0.44  | <i>not sig</i> | 5E-03 |
| <i>Bacteria;Firmicutes;Clostridia;Clostridiales;Lachnospiraceae;Blautia;unclassified</i>                         | 180414  | 0.0002 | 0.0004 | 0.48  | <i>not sig</i> | 3E-02 |
| <i>Bacteria;Firmicutes;Clostridia;Clostridiales;Lachnospiraceae;unclassified;unclassified</i>                    | 192983  | 0.0001 | 0.0002 | 0.47  | <i>not sig</i> | 4E-03 |
| <i>Bacteria;Firmicutes;Erysipelotrichi;Erysipelotrichales;Erysipelotrichaceae;[Eubacterium];dolichum</i>         | 548587  | 0.0006 | 0.0003 | 2.26  | <i>not sig</i> | 1E-02 |
| <i>Bacteria;Firmicutes;Clostridia;Clostridiales;[Mogibacteriaceae];unclassified;unclassified</i>                 | 3805726 | 0.0002 | 0.0001 | 4.34  | <i>not sig</i> | 4E-03 |
| <i>Bacteria;Firmicutes;Clostridia;Clostridiales;Ruminococcaceae;unclassified;unclassified</i>                    | 4438999 | 0.0007 | 0.0000 | 14.49 | <i>not sig</i> | 4E-02 |
| <i>Bacteria;Firmicutes;Clostridia;Clostridiales;Ruminococcaceae;Ruminococcus;unclassified</i>                    | 194297  | 0.0003 | 0.0008 | 0.32  | <i>not sig</i> | 3E-02 |
| <i>Bacteria;Firmicutes;Erysipelotrichi;Erysipelotrichales;Erysipelotrichaceae;[Eubacterium];dolichum</i>         | 539581  | 0.0010 | 0.0003 | 3.76  | <i>not sig</i> | 4E-02 |
| <i>Bacteria;Actinobacteria;Actinobacteria;Bifidobacteriales;Bifidobacteriaceae;Bifidobacterium;unclassified</i>  | 4376828 | 0.0004 | 0.0002 | 2.22  | <i>not sig</i> | 3E-02 |
| <i>Bacteria;Proteobacteria;Gammaproteobacteria;Pseudomonadales;Pseudomonadaceae;Pseudomonas;fragi</i>            | 1071450 | 0.0043 | 0.0096 | 0.45  | <i>not sig</i> | 1E-02 |
| <i>Bacteria;Firmicutes;Clostridia;Clostridiales;unclassified;unclassified;unclassified</i>                       | 178712  | 0.0005 | 0.0001 | 5.24  | <i>not sig</i> | 4E-02 |
| <i>Bacteria;Firmicutes;Clostridia;Clostridiales;unclassified;unclassified;unclassified</i>                       | 192015  | 0.0000 | 0.0002 | 0.26  | <i>not sig</i> | 8E-04 |
| <i>Bacteria;Bacteroidetes;Bacteroidia;Bacteroidales;Porphyromonadaceae;Porphyromonas;unclassified</i>            | 138179  | 0.0010 | 0.0004 | 2.72  | <i>not sig</i> | 3E-02 |
| <i>Bacteria;Firmicutes;Bacilli;Lactobacillales;Streptococcaceae;Streptococcus;unclassified</i>                   | 4315958 | 0.0001 | 0.0000 | 8.80  | <i>not sig</i> | 4E-03 |
| <i>Bacteria;Firmicutes;Clostridia;Clostridiales;unclassified;unclassified;unclassified</i>                       | 179785  | 0.0000 | 0.0002 | 0.25  | <i>not sig</i> | 4E-03 |
| <i>Bacteria;Firmicutes;Clostridia;Clostridiales;Lachnospiraceae;unclassified;unclassified</i>                    | 193863  | 0.0001 | 0.0002 | 0.59  | <i>not sig</i> | 4E-03 |
| <i>Bacteria;Firmicutes;Clostridia;Clostridiales;unclassified;unclassified;unclassified</i>                       | 360890  | 0.0006 | 0.0003 | 1.85  | <i>not sig</i> | 2E-02 |
| <i>Bacteria;Firmicutes;Clostridia;Clostridiales;Lachnospiraceae;Coproccoccus;unclassified</i>                    | 178686  | 0.0003 | 0.0004 | 0.67  | <i>not sig</i> | 2E-02 |
| <i>Bacteria;Firmicutes;Clostridia;Clostridiales;Lachnospiraceae;unclassified;unclassified</i>                    | 190226  | 0.0003 | 0.0001 | 2.70  | <i>not sig</i> | 2E-02 |
| <i>Bacteria;Firmicutes;Clostridia;Clostridiales;[Tissierellaceae];Anaerococcus;unclassified</i>                  | 4476950 | 0.0005 | 0.0001 | 3.97  | <i>not sig</i> | 4E-02 |
| <i>Bacteria;Firmicutes;Clostridia;Clostridiales;unclassified;unclassified;unclassified</i>                       | 182073  | 0.0001 | 0.0004 | 0.39  | <i>not sig</i> | 4E-02 |
| <i>Bacteria;Firmicutes;Clostridia;Clostridiales;[Tissierellaceae];Peptoniphilus;unclassified</i>                 | 4429335 | 0.0010 | 0.0002 | 4.98  | <i>not sig</i> | 4E-02 |
| <i>Bacteria;Firmicutes;Clostridia;Clostridiales;Ruminococcaceae;unclassified;unclassified</i>                    | 48084   | 0.0035 | 0.0039 | 0.88  | <i>not sig</i> | 4E-02 |
| <i>Bacteria;Firmicutes;Erysipelotrichi;Erysipelotrichales;Erysipelotrichaceae;Coproccoccus;unclassified</i>      | 151870  | 0.0002 | 0.0001 | 2.69  | <i>not sig</i> | 3E-02 |
| <i>Bacteria;Firmicutes;Clostridia;Clostridiales;Ruminococcaceae;Faecalibacterium;prausnitzii</i>                 | 181422  | 0.0001 | 0.0003 | 0.41  | <i>not sig</i> | 3E-02 |
| <i>Bacteria;Firmicutes;Clostridia;Clostridiales;Ruminococcaceae;unclassified;unclassified</i>                    | 193709  | 0.0003 | 0.0004 | 0.77  | <i>not sig</i> | 3E-02 |
| <i>Bacteria;Firmicutes;Clostridia;Clostridiales;[Tissierellaceae];Peptoniphilus;unclassified</i>                 | 1100471 | 0.0003 | 0.0001 | 5.77  | <i>not sig</i> | 5E-02 |
| <i>Bacteria;Firmicutes;Clostridia;Clostridiales;Lachnospiraceae;unclassified;unclassified</i>                    | 175145  | 0.0001 | 0.0002 | 0.56  | <i>not sig</i> | 5E-02 |
| <i>Bacteria;Firmicutes;Clostridia;Clostridiales;EtOH8;unclassified;unclassified</i>                              | 4311620 | 0.0001 | 0.0000 | 4.87  | <i>not sig</i> | 8E-03 |
| <i>Bacteria;Firmicutes;Clostridia;Clostridiales;Lachnospiraceae;unclassified;unclassified</i>                    | 183698  | 0.0001 | 0.0002 | 0.61  | <i>not sig</i> | 2E-02 |
| <i>Bacteria;Firmicutes;Clostridia;Clostridiales;unclassified;unclassified;unclassified</i>                       | 188127  | 0.0000 | 0.0001 | 0.45  | <i>not sig</i> | 4E-03 |
| <i>Bacteria;Actinobacteria;Actinobacteria;Actinomycetales;Actinomycetaceae;Mobiluncus;unclassified</i>           | 104135  | 0.0001 | 0.0000 | 6.90  | <i>not sig</i> | 3E-02 |
| <i>Bacteria;Actinobacteria;Actinobacteria;Bifidobacteriales;Bifidobacteriaceae;Bifidobacterium;adolescentis</i>  | 584375  | 0.0001 | 0.0000 | 2.64  | <i>not sig</i> | 4E-02 |
| <i>Bacteria;Firmicutes;Clostridia;Clostridiales;Lachnospiraceae;Roseburia;unclassified</i>                       | 162623  | 0.0001 | 0.0001 | 0.44  | <i>not sig</i> | 4E-02 |
| <i>Bacteria;Firmicutes;Clostridia;Clostridiales;Ruminococcaceae;unclassified;unclassified</i>                    | 4094259 | 0.0001 | 0.0001 | 0.52  | <i>not sig</i> | 2E-02 |
| <i>Bacteria;Proteobacteria;Gammaproteobacteria;Enterobacteriales;Enterobacteriaceae;Proteus;unclassified</i>     | 4385479 | 0.0054 | 0.0042 | 1.30  | <i>not sig</i> | 5E-03 |
| <i>Bacteria;Firmicutes;Clostridia;Clostridiales;Lachnospiraceae;unclassified;unclassified</i>                    | 177581  | 0.0001 | 0.0001 | 0.50  | <i>not sig</i> | 5E-02 |
| <i>Bacteria;Firmicutes;Clostridia;Clostridiales;unclassified;unclassified;unclassified</i>                       | 359762  | 0.0001 | 0.0002 | 0.49  | <i>not sig</i> | 2E-02 |

|                                                                                                               |         |        |        |       |                |       |
|---------------------------------------------------------------------------------------------------------------|---------|--------|--------|-------|----------------|-------|
| <i>Bacteria;Firmicutes;Clostridia;Clostridiales;Christensenellaceae;unclassified;unclassified</i>             | 231952  | 0.0000 | 0.0000 | 2.59  | <i>not sig</i> | 4E-02 |
| <i>Bacteria;Firmicutes;Clostridia;Clostridiales;unclassified;unclassified;unclassified</i>                    | 190864  | 0.0000 | 0.0001 | 0.34  | <i>not sig</i> | 3E-02 |
| <i>Bacteria;Firmicutes;Clostridia;Clostridiales;Ruminococcaceae;unclassified;unclassified</i>                 | 2835813 | 0.0002 | 0.0001 | 1.27  | <i>not sig</i> | 5E-02 |
| <i>Bacteria;Firmicutes;Clostridia;Clostridiales;Ruminococcaceae;Faecalibacterium;prausnitzii</i>              | 4476527 | 0.0000 | 0.0001 | 0.33  | <i>not sig</i> | 2E-02 |
| <i>Bacteria;Firmicutes;Clostridia;Clostridiales;Lachnospiraceae;Blautia;unclassified</i>                      | 184561  | 0.0000 | 0.0001 | 0.48  | <i>not sig</i> | 2E-02 |
| <i>Bacteria;Firmicutes;Clostridia;Clostridiales;Lachnospiraceae;Blautia;unclassified</i>                      | 181756  | 0.0001 | 0.0001 | 0.58  | <i>not sig</i> | 3E-02 |
| <i>Bacteria;Firmicutes;Clostridia;Clostridiales;Ruminococcaceae;unclassified;unclassified</i>                 | 564320  | 0.0001 | 0.0000 | 1.91  | <i>not sig</i> | 4E-02 |
| <i>Bacteria;Proteobacteria;Gammaproteobacteria;Enterobacteriales;Enterobacteriaceae;Serratia;unclassified</i> | 4328189 | 0.0022 | 0.0002 | 10.63 | <i>not sig</i> | 5E-02 |
| <i>Bacteria;Firmicutes;Clostridia;Clostridiales;unclassified;unclassified;unclassified</i>                    | 182196  | 0.0000 | 0.0001 | 0.27  | <i>not sig</i> | 3E-02 |

| B) Genus<br>Kingdom;Phylum;Class;Order;Family;Genus                                                     | Mean Abundance |          | Abundance ratio | ANCOM          | KW    |
|---------------------------------------------------------------------------------------------------------|----------------|----------|-----------------|----------------|-------|
|                                                                                                         | Cases          | Controls | Case/Control    | W              | FDR_P |
| <i>Bacteria;Firmicutes;Clostridia;Clostridiales;Lachnospiraceae;Roseburia</i>                           | 0.0065         | 0.0125   | 0.52            | 101            | 8E-07 |
| <i>Bacteria;Firmicutes;Clostridia;Clostridiales;Ruminococcaceae;Faecalibacterium</i>                    | 0.0317         | 0.0480   | 0.66            | 91             | 9E-04 |
| <i>Bacteria;Actinobacteria;Actinobacteria;Bifidobacteriales;Bifidobacteriaceae;Bifidobacterium</i>      | 0.0140         | 0.0076   | 1.85            | 90             | 6E-05 |
| <i>Bacteria;Firmicutes;Clostridia;Clostridiales;Lachnospiraceae;unclassified</i>                        | 0.0487         | 0.0725   | 0.67            | 90             | 1E-04 |
| <i>Bacteria;Firmicutes;Clostridia;Clostridiales;Lachnospiraceae;Blautia</i>                             | 0.0140         | 0.0194   | 0.72            | 90             | 6E-04 |
| <i>Bacteria;Firmicutes;Bacilli;Lactobacillales;Lactobacillaceae;Lactobacillus</i>                       | 0.0026         | 0.0004   | 7.27            | 89             | 5E-06 |
| <i>Bacteria;Verrucomicrobia;Verrucomicrobiae;Verrucomicrobiales;Verrucomicrobiaceae;Akkermansia</i>     | 0.0485         | 0.0185   | 2.63            | 86             | 1E-03 |
| <i>Bacteria;Firmicutes;Clostridia;Clostridiales;Christensenellaceae;unclassified</i>                    | 0.0073         | 0.0020   | 3.63            | 84             | 6E-04 |
| <i>Bacteria;Bacteroidetes;Bacteroidia;Bacteroidales;Porphyromonadaceae;Porphyromonas</i>                | 0.0033         | 0.0008   | 4.33            | <i>not sig</i> | 5E-04 |
| <i>Bacteria;Firmicutes;Erysipelotrichi;Erysipelotrichales;Erysipelotrichaceae;unclassified</i>          | 0.0025         | 0.0040   | 0.63            | <i>not sig</i> | 5E-03 |
| <i>Bacteria;Firmicutes;Erysipelotrichi;Erysipelotrichales;Erysipelotrichaceae;[Eubacterium]</i>         | 0.0043         | 0.0020   | 2.21            | <i>not sig</i> | 6E-04 |
| <i>Bacteria;Proteobacteria;Gammaproteobacteria;Pasteurellales;Pasteurellaceae;Haemophilus</i>           | 0.0003         | 0.0012   | 0.21            | <i>not sig</i> | 3E-03 |
| <i>Bacteria;Firmicutes;Clostridia;Clostridiales;Peptococcaceae;rc4-4</i>                                | 0.0001         | 0.0003   | 0.34            | <i>not sig</i> | 2E-03 |
| <i>Bacteria;Firmicutes;Clostridia;Clostridiales;Lachnospiraceae;Anaerostipes</i>                        | 0.0008         | 0.0014   | 0.60            | <i>not sig</i> | 1E-02 |
| <i>Bacteria;Firmicutes;Clostridia;Clostridiales;Lachnospiraceae;Lachnospira</i>                         | 0.0044         | 0.0052   | 0.84            | <i>not sig</i> | 2E-02 |
| <i>Bacteria;Actinobacteria;Actinobacteria;Actinomycetales;Corynebacteriaceae;Corynebacterium</i>        | 0.0027         | 0.0012   | 2.34            | <i>not sig</i> | 2E-03 |
| <i>Bacteria;Firmicutes;Clostridia;Clostridiales;Lachnospiraceae;Coprococcus</i>                         | 0.0124         | 0.0144   | 0.86            | <i>not sig</i> | 1E-02 |
| <i>Bacteria;Firmicutes;Erysipelotrichi;Erysipelotrichales;Erysipelotrichaceae;Coproccillus</i>          | 0.0020         | 0.0005   | 4.48            | <i>not sig</i> | 1E-03 |
| <i>Bacteria;Firmicutes;Clostridia;Clostridiales;Veillonellaceae;Megasphaera</i>                         | 0.0046         | 0.0012   | 3.74            | <i>not sig</i> | 1E-03 |
| <i>Bacteria;Firmicutes;Clostridia;Clostridiales;[Tissierellaceae];WAL_1855D</i>                         | 0.0053         | 0.0015   | 3.47            | <i>not sig</i> | 5E-03 |
| <i>Bacteria;Proteobacteria;Deltaproteobacteria;Desulfovibrionales;Desulfovibrionaceae;Bilophila</i>     | 0.0038         | 0.0025   | 1.49            | <i>not sig</i> | 6E-03 |
| <i>Bacteria;Firmicutes;Clostridia;Clostridiales;[Tissierellaceae];Anaerococcus</i>                      | 0.0015         | 0.0004   | 3.79            | <i>not sig</i> | 2E-03 |
| <i>Archaea;Euryarchaeota;Methanobacteria;Methanobacteriales;Methanobacteriaceae;Methanobrevibacter</i>  | 0.0005         | 0.0004   | 1.32            | <i>not sig</i> | 2E-03 |
| <i>Bacteria;Actinobacteria;Coriobacteriia;Coriobacteriales;Coriobacteriaceae;unclassified</i>           | 0.0006         | 0.0003   | 1.94            | <i>not sig</i> | 1E-03 |
| <i>Bacteria;Bacteroidetes;Bacteroidia;Bacteroidales;Bacteroidaceae;Bacteroides</i>                      | 0.2467         | 0.2810   | 0.88            | <i>not sig</i> | 8E-03 |
| <i>Bacteria;Firmicutes;Clostridia;Clostridiales;Clostridiaceae;Sarcina</i>                              | 0.0001         | 0.0001   | 0.85            | <i>not sig</i> | 2E-02 |
| <i>Bacteria;Firmicutes;Clostridia;Clostridiales;Ruminococcaceae;Anaerotruncus</i>                       | 0.0007         | 0.0003   | 2.65            | <i>not sig</i> | 1E-02 |
| <i>Bacteria;Firmicutes;Clostridia;Clostridiales;Veillonellaceae;Phascolarctobacterium</i>               | 0.0047         | 0.0068   | 0.69            | <i>not sig</i> | 4E-02 |
| <i>Bacteria;Proteobacteria;Deltaproteobacteria;Desulfovibrionales;Desulfovibrionaceae;Desulfovibrio</i> | 0.0013         | 0.0012   | 1.11            | <i>not sig</i> | 6E-03 |
| <i>Bacteria;Firmicutes;Clostridia;Clostridiales;[Mogibacteriaceae];unclassified</i>                     | 0.0010         | 0.0006   | 1.71            | <i>not sig</i> | 8E-03 |
| <i>Bacteria;Firmicutes;Clostridia;Clostridiales;[Tissierellaceae];Peptoniphilus</i>                     | 0.0024         | 0.0009   | 2.86            | <i>not sig</i> | 5E-03 |
| <i>Bacteria;Bacteroidetes;Bacteroidia;Bacteroidales;Porphyromonadaceae;Parabacteroides</i>              | 0.0407         | 0.0300   | 1.36            | <i>not sig</i> | 8E-03 |
| <i>Bacteria;Bacteroidetes;Bacteroidia;Bacteroidales;Rikenellaceae;Alistipes</i>                         | 0.0013         | 0.0005   | 2.74            | <i>not sig</i> | 7E-03 |
| <i>Bacteria;Firmicutes;Clostridia;Clostridiales;[Tissierellaceae];1-68</i>                              | 0.0016         | 0.0007   | 2.36            | <i>not sig</i> | 1E-02 |
| <i>Bacteria;Synergistetes;Synergistia;Synergistales;Synergistaceae;Cloacibacillus</i>                   | 0.0006         | 0.0000   | 15.89           | <i>not sig</i> | 1E-02 |
| <i>Bacteria;Actinobacteria;Coriobacteriia;Coriobacteriales;Coriobacteriaceae;Adlercreutzia</i>          | 0.0001         | 0.0001   | 1.98            | <i>not sig</i> | 4E-02 |
| <i>Bacteria;Firmicutes;Clostridia;Clostridiales;[Tissierellaceae];ph2</i>                               | 0.0003         | 0.0001   | 3.81            | <i>not sig</i> | 3E-03 |

|                                                                                                          |        |        |      |                |       |
|----------------------------------------------------------------------------------------------------------|--------|--------|------|----------------|-------|
| <i>Bacteria;Firmicutes;Clostridia;Clostridiales;EtOH8;unclassified</i>                                   | 0.0001 | 0.0000 | 4.56 | <i>not sig</i> | 1E-03 |
| <i>Bacteria;Actinobacteria;Actinobacteria;Actinomycetales;Actinomycetaceae;Mobiluncus</i>                | 0.0001 | 0.0000 | 6.75 | <i>not sig</i> | 4E-03 |
| <i>Bacteria;Actinobacteria;Actinobacteria;Actinomycetales;Actinomycetaceae;Varibaculum</i>               | 0.0005 | 0.0001 | 4.00 | <i>not sig</i> | 3E-02 |
| <i>Bacteria;Firmicutes;Bacilli;Bacillales;Staphylococcaceae;Staphylococcus</i>                           | 0.0001 | 0.0000 | 2.53 | <i>not sig</i> | 2E-02 |
| <i>Bacteria;Firmicutes;Clostridia;Clostridiales;[Mogibacteriaceae];Mogibacterium</i>                     | 0.0001 | 0.0000 | 6.49 | <i>not sig</i> | 7E-03 |
| <i>Bacteria;Proteobacteria;Epsilonproteobacteria;Campylobacteriales;Campylobacteraceae;Campylobacter</i> | 0.0007 | 0.0002 | 3.55 | <i>not sig</i> | 4E-02 |
| <i>Bacteria;Lentisphaerae;[Lentisphaeria];Victivallales;Victivallaceae;unclassified</i>                  | 0.0004 | 0.0002 | 2.36 | <i>not sig</i> | 4E-02 |
| <i>Bacteria;Proteobacteria;Gammaproteobacteria;Enterobacteriales;Enterobacteriaceae;Proteus</i>          | 0.0049 | 0.0041 | 1.21 | <i>not sig</i> | 9E-04 |
| <i>Bacteria;Proteobacteria;Gammaproteobacteria;Pseudomonadales;Pseudomonadaceae;Pseudomonas</i>          | 0.0105 | 0.0119 | 0.88 | <i>not sig</i> | 3E-02 |
| <i>Bacteria;Bacteroidetes;Bacteroidia;Bacteroidales;[Odoribacteraceae];Butyricimonas</i>                 | 0.0020 | 0.0015 | 1.32 | <i>not sig</i> | 4E-02 |
| <i>Bacteria;Firmicutes;Clostridia;Clostridiales;Veillonellaceae;Acidaminococcus</i>                      | 0.0037 | 0.0020 | 1.85 | <i>not sig</i> | 4E-02 |

| <b>C) Family</b>                                                                          | <b>Mean Abundance</b> |                 | <b>Abundance ratio</b> | <b>ANCOM</b>   | <b>KW</b>    |
|-------------------------------------------------------------------------------------------|-----------------------|-----------------|------------------------|----------------|--------------|
| <b>Kingdom;Phylum;Class;Order;Family</b>                                                  | <b>Cases</b>          | <b>Controls</b> | <b>Case/Control</b>    | <b>W</b>       | <b>FDR_P</b> |
| <i>Bacteria;Actinobacteria;Actinobacteria;Bifidobacteriales;Bifidobacteriaceae</i>        | 0.0140                | 0.0076          | 1.85                   | 46             | 5E-05        |
| <i>Bacteria;Firmicutes;Bacilli;Lactobacillales;Lactobacillaceae</i>                       | 0.0029                | 0.0004          | 7.24                   | 46             | 5E-05        |
| <i>Bacteria;Firmicutes;Clostridia;Clostridiales;Christensenellaceae</i>                   | 0.0073                | 0.0020          | 3.62                   | 46             | 1E-03        |
| <i>Bacteria;Verrucomicrobia;Verrucomicrobiae;Verrucomicrobiales;Verrucomicrobiaceae</i>   | 0.0481                | 0.0184          | 2.61                   | 46             | 3E-03        |
| <i>Bacteria;Firmicutes;Clostridia;Clostridiales;Lachnospiraceae</i>                       | 0.1099                | 0.1447          | 0.76                   | 39             | 2E-03        |
| <i>Bacteria;Firmicutes;Clostridia;Clostridiales;[Tissierellaceae]</i>                     | 0.0122                | 0.0040          | 3.08                   | 38             | 8E-03        |
| <i>Bacteria;Proteobacteria;Gammaproteobacteria;Pasteurellales;Pasteurellaceae</i>         | 0.0003                | 0.0012          | 0.21                   | 37             | 8E-03        |
| <i>Bacteria;Bacteroidetes;Bacteroidia;Bacteroidales;Porphyromonadaceae</i>                | 0.0437                | 0.0305          | 1.44                   | <i>not sig</i> | 2E-03        |
| <i>Bacteria;Proteobacteria;Deltaproteobacteria;Desulfovibrionales;Desulfovibrionaceae</i> | 0.0052                | 0.0038          | 1.38                   | <i>not sig</i> | 3E-03        |
| <i>Bacteria;Actinobacteria;Actinobacteria;Actinomycetales;Corynebacteriaceae</i>          | 0.0027                | 0.0012          | 2.30                   | <i>not sig</i> | 3E-03        |
| <i>Bacteria;Synergistetes;Synergistia;Synergistales;Synergistaceae</i>                    | 0.0008                | 0.0001          | 10.31                  | <i>not sig</i> | 3E-03        |
| <i>Archaea;Euryarchaeota;Methanobacteria;Methanobacteriales;Methanobacteriaceae</i>       | 0.0006                | 0.0004          | 1.36                   | <i>not sig</i> | 4E-03        |
| <i>Bacteria;Bacteroidetes;Bacteroidia;Bacteroidales;Bacteroidaceae</i>                    | 0.2441                | 0.2789          | 0.88                   | <i>not sig</i> | 2E-02        |
| <i>Bacteria;Firmicutes;Clostridia;Clostridiales;[Mogibacteriaceae]</i>                    | 0.0011                | 0.0006          | 1.89                   | <i>not sig</i> | 2E-02        |
| <i>Bacteria;Actinobacteria;Coriobacteriia;Coriobacteriales;Coriobacteriaceae</i>          | 0.0019                | 0.0013          | 1.43                   | <i>not sig</i> | 1E-02        |
| <i>Bacteria;Firmicutes;Clostridia;Clostridiales;EtOH8</i>                                 | 0.0001                | 0.0000          | 4.62                   | <i>not sig</i> | 3E-03        |
| <i>Bacteria;Firmicutes;Bacilli;Bacillales;Staphylococcaceae</i>                           | 0.0001                | 0.0000          | 2.77                   | <i>not sig</i> | 4E-02        |
| <i>Bacteria;Firmicutes;Clostridia;Clostridiales;Eubacteriaceae</i>                        | 0.0001                | 0.0000          | 3.51                   | <i>not sig</i> | 4E-02        |
| <i>Bacteria;Lentisphaerae;[Lentisphaeria];Victivallales;Victivallaceae</i>                | 0.0004                | 0.0002          | 2.56                   | <i>not sig</i> | 4E-02        |

Table S3. Replication of statistically significant findings of prior studies.

| Phylum                 | Class                      | Order                     | Family                      | Genus                               | Species | Other grouping                                   | A                         | B                          | C                      | D                   | E                                       |
|------------------------|----------------------------|---------------------------|-----------------------------|-------------------------------------|---------|--------------------------------------------------|---------------------------|----------------------------|------------------------|---------------------|-----------------------------------------|
|                        |                            |                           |                             |                                     |         |                                                  | Scheperjans et al. (2014) | Keshavarzian et al. (2015) | Hasegawa et al. (2015) | Unger et al. (2016) | Present study                           |
|                        |                            |                           |                             |                                     |         |                                                  | N=72, 72<br>Finland       | N=38, 34<br>U.S.           | N=45, 35<br>Japan      | N=34, 34<br>Germany | N=197, 130<br>U.S.                      |
| <i>Bacteroidetes</i>   | <i>Bacteroidia</i>         | <i>Bacteroidales</i>      | <i>Prevotellaceae</i>       |                                     |         |                                                  | Decreased                 | NS                         | NR                     | NS                  | NS                                      |
| <i>Firmicutes</i>      | <i>Clostridia</i>          | <i>Clostridiales</i>      | <i>Lachnospiraceae</i>      | <i>Blautia</i>                      |         |                                                  | NR                        | Decreased                  | NR                     | NR                  | Decreased P=0.01<br>P=0.52 <sup>a</sup> |
| <i>Firmicutes</i>      | <i>Clostridia</i>          | <i>Clostridiales</i>      | <i>Lachnospiraceae</i>      | <i>Coprococcus</i>                  |         |                                                  | NR                        | Decreased                  | NR                     | NR                  | IC                                      |
| <i>Firmicutes</i>      | <i>Clostridia</i>          | <i>Clostridiales</i>      | <i>Lachnospiraceae</i>      | <i>Dorea</i>                        |         |                                                  | NR                        | Decreased                  | NR                     | NR                  | NS                                      |
| <i>Firmicutes</i>      | <i>Clostridia</i>          | <i>Clostridiales</i>      | <i>Lachnospiraceae</i>      | <i>Roseburia</i>                    |         |                                                  | NR                        | Decreased                  | NR                     | NR                  | Decreased P=5E-4                        |
| <i>Firmicutes</i>      | <i>Clostridia</i>          | <i>Clostridiales</i>      | <i>Lachnospiraceae</i>      |                                     |         |                                                  | NR                        | Decreased                  | NR                     | NR                  | Decreased P=3E-3                        |
| <i>Firmicutes</i>      | <i>Erysipelotrichi</i>     | <i>Erysipelotrichales</i> | [ <i>Coprobacillaceae</i> ] |                                     |         |                                                  | NR                        | Decreased                  | NR                     | NR                  | NC                                      |
| <i>Firmicutes</i>      |                            |                           |                             |                                     |         |                                                  | NR                        | Decreased                  | NR                     | NS                  | NS                                      |
| <i>Bacteroidetes</i>   |                            |                           |                             |                                     |         |                                                  | NR                        | Increased                  | NR                     | Decreased           | NS                                      |
| <i>Bacteroidetes</i>   | <i>Bacteroidia</i>         | <i>Bacteroidales</i>      | <i>Bacteroidaceae</i>       | <i>Bacteroides</i>                  |         |                                                  | NR                        | Increased                  | NR                     | NR                  | NS                                      |
| <i>Bacteroidetes</i>   | <i>Bacteroidia</i>         | <i>Bacteroidales</i>      | <i>Bacteroidaceae</i>       |                                     |         |                                                  | NR                        | Increased                  | NR                     | NR                  | NS                                      |
| <i>Firmicutes</i>      | <i>Clostridia</i>          | <i>Clostridiales</i>      | <i>Clostridiaceae</i>       |                                     |         |                                                  | NR                        | Increased                  | NR                     | NR                  | NS                                      |
| <i>Firmicutes</i>      | <i>Clostridia</i>          | <i>Clostridiales</i>      | <i>Ruminococcaceae</i>      | <i>Oscillospira</i>                 |         |                                                  | NR                        | Increased                  | NR                     | NR                  | NS                                      |
| <i>Proteobacteria</i>  |                            |                           |                             |                                     |         |                                                  | NR                        | Increased                  | NR                     | NR                  | NS                                      |
| <i>Verrucomicrobia</i> | <i>Verrucomicrobiae</i>    | <i>Verrucomicrobiales</i> | <i>Verrucomicrobiaceae</i>  | <i>Akkermansia</i>                  |         |                                                  | NR                        | Increased                  | NR                     | NR                  | Increased P=1E-4                        |
|                        |                            |                           |                             |                                     |         | <i>C. coccoides</i> group                        | NR                        | NR                         | Decreased              | NR                  | NC                                      |
|                        |                            |                           |                             |                                     |         | <i>C. leptum</i> group                           | NR                        | NR                         | Decreased              | NR                  | NC                                      |
|                        |                            |                           |                             |                                     |         | <i>B. fragilis</i> group                         | NR                        | NR                         | Decreased              | NR                  | NC                                      |
| <i>Firmicutes</i>      | <i>Bacilli</i>             | <i>Lactobacillales</i>    | <i>Lactobacillaceae</i>     | <i>Lactobacillus</i>                |         |                                                  | NR                        | NR                         | Increased              | NR                  | Increased P=4E-8                        |
| <i>Firmicutes</i>      | <i>Clostridia</i>          | <i>Clostridiales</i>      | <i>Ruminococcaceae</i>      | <i>Faecalibacterium prausnitzii</i> |         |                                                  | NR                        | NR                         | NR                     | Decreased           | Decreased P=6E-3<br>P=0.05 <sup>a</sup> |
|                        |                            |                           |                             |                                     |         | <i>Lactobacillaceae</i> + <i>Enterococcaceae</i> | NR                        | NR                         | NR                     | Decreased           | NS                                      |
| <i>Actinobacteria</i>  | <i>Actinobacteria</i>      | <i>Bifidobacteriales</i>  | <i>Bifidobacteriaceae</i>   | <i>Bifidobacterium</i>              |         |                                                  | NR                        | NS                         | NS                     | Increased           | Increased P=3E-6                        |
| <i>Proteobacteria</i>  | <i>Gammaproteobacteria</i> | <i>Enterobacteriales</i>  | <i>Enterobacteriaceae</i>   |                                     |         |                                                  | NR                        | NS                         | NS                     | Increased           | NS                                      |

Only findings that achieved statistical significance in the original papers were included here. We did not include non-significant trends and descriptive associations (even if they were highlighted in the article Abstracts as a major finding) because they were selectively reported by only some authors and were not based on a set criterion that we could apply across studies.

Decreased or Increased: statistically significant decreased or increased abundance in PD vs. control samples.

N=number of cases and controls analyzed

NR: Not reported.

NS: Not significant. For prior reports, we deferred to their definition of statistical significance. For present study, NS represents not significant by Kruskal-Wallis and by ANCOM.

NC: Not called

IC: Inconclusive. An OTU belonging to genus *Coprococcus* was significantly decreased in PD (abundance=0.001 in cases, 0.002 in controls, see **Table 2**); when collapsed to the genus level per prior study, the reduced abundance in patients (0.012 in cases, 0.014 in controls) was significant by Kruskal-Wallis (P=0.01), but not by ANCOM or GLM.

<sup>a</sup> The second P value reflects the drug effect, testing 141 cases not on COMT inhibitor or anticholinergic drugs vs. 130 controls.
